# Supplementary material for: Empirically based dimensions of externalizing symptoms in children and adolescents: a multitrait-multisource approach
Source: Springer Nature journal article supplement (doi:10.1007/s10862-022-09983-7), 2022-06-28
Supplement: MOESM1 [file 23213396]

**Online Supplement Materials**

Empirically Based Dimensions of Externalizing Symptoms in Children and Adolescents: A Multitrait-Multisource Approach

Ann-Kathrin Thöne1*‡, Michaela Junghänel1‡, Anja Görtz-Dorten1,2, Dieter Breuer1, Teresa del Giudice1, Charlotte Hanisch3 Thomas Hennemann3 & Manfred Döpfner1,2,3

1 School of Child and Adolescent Cognitive Behavior Therapy (AKiP), Faculty of Medicine and University Hospital Cologne, University of Cologne, Cologne, Germany.

2 Department of Child and Adolescent Psychiatry, Psychosomatics and Psychotherapy, Faculty of Medicine and University Hospital Cologne, University of Cologne, Cologne, Germany.

﻿3 Department of Special Education, Faculty of Human Sciences, University of Cologne, Cologne, Germany.

‡ Shared first authorship: These authors contributed equally to this work.

* Correspondence:Ann-Kathrin Thöne
ann-kathrin.thoene@uk-koeln.de

Pohligstraße 9, 50969 Cologne, Germany.

**Table S1**

*Model Fit Indices and Correlations Between the First-Order Factors or the Specific Factors*

| Model | χ² (*df*) | CFI | TLI | RMSEA (90% CI) | SRMR | Significant correlations | |
| --- | --- | --- | --- | --- | --- | --- | --- |
| FBB-P-Clinical | | | | | | | |
| Uni | 352.413* (27) | .940 | .920 | .127 (.116, .139) | .073 | n/a | |
| CFM-2 | 94.648* (26) | .987 | .982 | .060 (.047, .073) | .046 | ADHD-ODD/CD: .74* | |
| CFM-3 | 68.707* (24) | .992 | .988 | .050 (.036, .064) | .041 | ODD-ADHD: .75*  CD-ADHD: .65*  CD-ODD: .87* | |
| CFM-3* | 61.214* (24) | .993 | .990 | .046 (.032, .060) | .036 | AGG-ADHD: .75*  RB-ADHD: .58*  RB-AGG: .81* | |
|  |  |  |  |  |  |  | |
| BI Ext | 41.439* (18) | .996 | .991 | .042 (.025, .059) | .029 | n/a | |
| BI Ext S-1 | 41.334 (19) | .996 | .992 | .040 (.023, .056) | .030 | -a | |
| BI Ext S-1* | 47.825* (20) | .995 | .991 | .043 (.028, .059) | .029 | -a | |
| SBB-Clinical | | | | | | | |
| Uni | 74.997* (27) | .970 | .960 | .067 (.049, .086) | .058 | n/a | |
| CFM-2 | 45.214* (26) | .988 | .983 | .044 (.021, .065) | .049 | ADHD-ODD/CD: .81* | |
| CFM-3 | 27.726 (24) | .998 | .996 | .020 (.000, .048) | .036 | ODD-ADHD: .80*  CD-ADHD: .73*  CD-ODD: .79* | |
| CFM-3* | 31.625* (24) | .995 | .993 | .029 (.000, .053) | .038 | AGG-ADHD: .82*  RB-ADHD: .68*  RB-AGG: .82* | |
| BI Ext | 10.555 (18) | 1.000 | 1.000 | .000 (.000, .0118) | .020 | n/a | |
| BI Ext S-1 | 12.532 (19) | 1.000 | 1.000 | .000 (.000, .024) | .000 | -a | |
| BI Ext S-1* | 21.299* (20) | .999 | .999 | .013 (.000, .046) | .032 | -a | |
| FBB-P-Community | | | | | | | |
| Uni | 398.435* (27) | .958 | .944 | .081 (.074, .088) | .065 | n/a | |
| CFM-2 | 136.698* (26) | .988 | .983 | .045 (.038, .052) | .043 | ADHD-ODD/CD: .81* | |
| CFM-3 | 94.684* (24) | .992 | .988 | .037 (.030, .045) | .031 | ODD-ADHD: .82*  CD-ADHD: .70*  CD-ODD: .86* | |
| CFM-3* | 102.154* (24) | .991 | .987 | .039 (.032, .047) | .033 | AGG-ADHD: .82*  RB-ADHD: .68*  RB-AGG: .85* | |
| BI Ext | 57.898* (18) | .995 | .991 | .032 (.023, .042) | .025 | n/a | |
| BI Ext S-1 | 78.230* (19) | .993 | .987 | .038 (.030, .047) | .025 | -a | |
| BI Ext S-1* | 86.824* (20) | .992 | .986 | .040 (.031, .049) | .029 | -a | |
| SBB-Community | | | | | | |
| Uni | 213.135* (27) | .921 | .894 | .085 (.074, .096) | .087 | n/a | |
| CFM-2 | 163.241* (26) | .941 | .919 | .074 (.063, .085) | .074 | ADHD-ODD/CD: .80* | |
| CFM-3 | 75.048* (24) | .978 | .967 | .047 (.035, .059) | .042 | ODD-ADHD: .86*  CD-ADHD: .55*  CD-ODD: .69* | |
| CFM-3* | 112.222* | .962 | .944 | .062 (.051, .074) | .057 | AGG-ADHD: .85*  RB-ADHD: .53*  RB-AGG: .74* | |
| BI Ext | 35.405 (18) | .998 | .985 | .032 (.016, .047) | .027 | n/a | |
| BI Ext S-1 | 53.885* (19) | .985 | .972 | .044 (.030, .058) | .034 | -a | |
| BI Ext S-1 | 104.285* (20) | .964 | .935 | .066 (.054, .079) | .056 | -a | |
| FBB-T-Special Needs School | | | | | | | |
| Uni | 509.895* (27) | .945 | .927 | .154 (.142, .166) | .067 | n/a | |
| CFM-2 | 163.436* (26) | .984 | .978 | .084 (.072, .096) | .042 | ADHD-ODD/CD: .78* | |
| CFM-3 | 161.049* (24) | .984 | .977 | .087 (.075, .100) | .041 | ODD-ADHD: .79*  CD-ADHD: .75*  CD-ODD: .97* | |
| CFM-3* | 135.735* (24) | .987 | .981 | .079 (.066, .092) | .037 | AGG-ADHD: .85*  RB-ADHD: .53*  RB-AGG: .74* | |
| BI Ext | 48.031* (18) | .997 | .993 | .047 (.031, .063) | .024 | n/a | |
| BI Ext S-1 | 63.047* (19) | .995 | .991 | .055 (.041, .071) | .025 | -a | |
| BI Ext S-1* | Model not identified | | | | | | |

*Note*. χ² = Chi-Square, *df* = degrees of freedom, CFI = comparative fit index, TLI = Tucker-Lewis index, RMSEA = root mean square error of approximation, CI = confidence intervals, SRMR = standardized root mean square residuals, FBB-P-Clinical = clinical sample of children and adolescents based on proxy ratings completed by parents, SBB-Clinical = clinical sample of adolescents based on self-ratings, FBB-P-Community = community sample of children and adolescents based on proxy ratings completed by parents, SBB-Community = community sample of adolescents based on proxy ratings completed by parents FBB-T-Special Needs School = pupils attending special needs schools based on proxy ratings completed by teachers. Figure 1 shows the path diagrams for all factor models. Uni = unidimensional model of externalizing symptomatology, CFM-2 = factor model with two correlated factors (ADHD, ODD/CD), CFM-3 = factor model with three correlated factors (ADHD, ODD, CD), CFM-3* = factor model with three correlated factors (ADHD, AGG, RB), BI Ext = bifactor model of externalizing symptomatology, BI Ext S-1 = bifactor S-1 model of externalizing symptomatology with ODD as a general reference factor, BI Ext S-1* = bifactor S-1 model of externalizing symptomatology with AGG as a general reference factor, n/a = not applicable, ADHD = attention-deficit/hyperactivity disorder, ODD = oppositional defiant disorder, CD = conduct disorder, AGG = aggression, RB = rule-breaking.

* *p* < .001

a residual correlations

**Table S2**

*Standardized Factor Loadings (Standard Error) and Omega Statistics for all Bifactor (S-1) Models*

|  | FBB-P-Clinical | | | SBB-Clinical | | | FBB-P-Community | | | SBB-Community | | | FBB-T-Special Needs School | | |
| --- | --- | --- | --- | --- | --- | --- | --- | --- | --- | --- | --- | --- | --- | --- | --- |
| Bifactor Models | | | | | | | | | | | | | | | |
| Item | G-External | S-ADHD | S-ODD/CD | G-External | S-ADHD | S-ODD/CD | G-External | S-ADHD | S-ODD/CD | G-External | S-ADHD | S-ODD/CD | G-External | S-ADHD | S-  ODD/CD |
|  |  |  |  |  |  |  |  |  |  |  |  |  |  |  |  |
| S01 | .55 (.03) | .52 (.04) |  | .56 (.05) | .35 (.08) |  | .59 (.03) | .42 (.03) |  | .58 (.03) | .40 (.09) |  | .56 (.03) | .51 (.04) |  |
| S02 | .73 (.03) | .54 (.04) |  | .67 (.04) | .35 (.07) |  | .72 (.02) | .43 (.03) |  | .71 (.03) | .22 (.06) |  | .78 (.02) | .46 (.03) |  |
| S03 | .56 (.03) | .59 (.04) |  | .50 (.05) | .60 (.11) |  | .65 (.02) | .60 (.04) |  | .61 (.04) | .63 (.13) |  | .61 (.03) | .67 (.03) |  |
| S04 | .79 (.02) |  | .02 (.08) | .75 (.04) |  | -.22 (.11) | .81 (.02) |  | -.15 (.07) | .75 (.03) |  | -.09 (.07) | .82 (.02) |  | -.09 (.07) |
| S05 | .94 (.02) |  | .04 (.08) | .80 (.04) |  | -.09 (.12) | .87 (.01) |  | .09 (.05) | .79 (.03) |  | .16 (.06) | .96 (.01) |  | .01 (.03) |
| S06 | .79 (.04) |  | .20 (.09) | .76 (.06) |  | .19 (.12) | .69 (.04) |  | .24 (.08) | .62 (.08) |  | .50 (.10) | .83 (.02) |  | .02 (.03) |
| S07 | .52 (.05) |  | .45 (.10) | .63 (.06) |  | .33 (.11) | .60 (.04) |  | .52 (.09) | .49 (.05) |  | .53 (.07) | .61 (.04) |  | 1.34 (1.00) |
| S08 | .69 (.05) |  | .54 (.11) | .81 (.08) |  | .53 (.14) | .71 (.04) |  | .31 (.08) | .46 (.08) |  | .85 (.09) | .77 (.03) |  | .09 (.07) |
| S09 | .16 (.08) |  | .39 (.11) | .32 (.08) |  | .46 (.14) | .57 (.06) |  | .40 (.09) | .34 (.07) |  | .41 (.10) | .24 (.06) |  | .18 (.14) |
| Ω | .92 | .86 | .88 | .91 | .77 | .88 | .93 | .86 | .90 | .91 | .81 | .88 | a | a | a |
| ωH | .79 | - | - | .83 | - | - | .84 | - | - | .73 | - | - | a | - | - |
| ωHS | - | .39 | .13 | - | .28 | .07 | - | .30 | .09 | - | .25 | .28 | - | a | q |
| ECV | .72 | .16 | .12 | .75 | .11 | .13 | .77 | .13 | .11 | .62 | .11 | .27 | a | a | a |
| Bifactor S-1 Models (BI Ext S-1) | | | | | | | | | | | | | | | |
|  | G-External | S-ADHD | S- CD | G-External | S-ADHD | S- CD | G-External | S-ADHD | S- CD | G-External | S-ADHD | S- CD | G-External | S-ADHD | S- CD |
| S01 | .55 (.03) | .51 (.04) |  | .54 (.05) | .42 (.09) |  | .60 (.02) | .41 (.03) |  | .57 (.03) | .41 (.08) |  | .55 (.03) | .52 (.04) |  |
| S02 | .73 (.02) | .55 (.04) |  | .66 (.04) | .37 (.07) |  | .73 (.02) | .42 (.03) |  | .71 (.03) | .23 (.06) |  | .78 (.02) | .46 (.03) |  |
| S03 | .55 (.03) | .59 (.04) |  | .49 (.06) | .55 (.10) |  | .66 (.02) | .59 (.04) |  | .61 (.04) | .63 (.12) |  | .61 (.03) | .67 (.03) |  |
| S04 | .79 (.02) |  |  | .75 (.04) |  |  | .78 (.01) |  |  | .72 (.03) |  |  | .81 (.02) |  |  |
| S05 | .94 (.02) |  |  | .82 (.04) |  |  | .88 (.01) |  |  | .82 (.03) |  |  | .97 (.01) |  |  |
| S06 | .80 (.03) |  | .18 (.07) | .71 (.07) |  | .32 (.11) | .69 (.04) |  | .24 (.08) | .63 (.07) |  | .50 (.09) | .83 (.02) |  | .04 (.06) |
| S07 | .53 (.04) |  | .43 (.10) | .57 (.05) |  | .43 (.11) | .60 (.03) |  | .44 (.08) | .50 (.05) |  | .51 (.07) | .56 (.03) |  | 1.68 (2.61) |
| S08 | .71 (.04) |  | .52 (.10) | .70 (.08) |  | .66 (.11) | .72 (.04) |  | .33 (.09) | .48 (.07) |  | .82 (.09) | .77 (.03) |  | .09 (.15) |
| S09 | .17 (.07) |  | .39 (.11) | .22 (.08) |  | .53 (.13) | .56 (.06) |  | .52 (.10) | .35 (.07) |  | .41 (.10) | .24 (.06) |  | .15 (.25) |
| ω | .92 | .86 | .79 | .90 | .77 | .84 | .93 | .86 | .84 | .91 | .81 | .84 | a | a | a |
| ωH | .80 | - | - | .76 | - | - | .84 | - | - | .74 | - | - | a | - | - |
| ωHS | - | .39 | .26 | - | .29 | .37 | - | .29 | .22 | - | .25 | .48 | - | a | a |
| ECV | .73 | .16 | .11 | .69 | .12 | .19 | .77 | .12 | .11 | .63 | .12 | .25 | a | a | a |
|  | Bifactor S-1 Models (BI Ext S-1*) | | | | | | | | | | | | | | |
|  | G-External | S-ADHD | S- RB | G-External | S-ADHD | S- RB | G-External | S-ADHD | S- RB | G-External | S-ADHD | S- RB | G-External | S-ADHD | S- RB |
| S01 | .57 (.03) | .51 (.04) |  | .56 (.05) | .36 (.09) |  | .61 (.02) | .39 (.03) |  | .57 (.03) | .42 (.07) |  | .55b | .52b |  |
| S02 | .73 (.02) | .55 (.04) |  | .67 (.04) | .35 (.08) |  | .73 (.02) | .42 (.03) |  | .69 (.03) | .27 (.05) |  | .78b | .46b |  |
| S03 | .55 (.03) | .59 (.04) |  | .50 (.05) | .59 (.11) |  | .67 (.02) | .60 (.04) |  | .61 (.04) | .61 (.10) |  | .61b | .67b |  |
| S04 | .78 (.02) |  |  | .73 (.04) |  |  | .78 (.01) |  |  | .70 (.03) |  |  | .81b |  |  |
| S05 | .94 (.02) |  |  | .80 (.04) |  |  | .87 (.01) |  |  | .81 (.03) |  |  | .97b |  |  |
| S06 | .82 (.03) |  |  | .81 (.05) |  |  | .72 (.04) |  |  | .75 (.06) |  |  | .84b |  |  |
| S07 | .56 (.04) |  | .47 (.12) | .61 (.05) |  | .42 (.14) | .63 (.03) |  | .32 (.08) | .56 (.04) |  | .42 (.10) | .58b |  | 15.36b |
| S08 | .74 (.04) |  | .38 (.10) | .82 (.06) |  | .44 (.11) | .74 (.04) |  | .27 (.09) | .62 (.06) |  | .74 (.16) | .77b |  | .01b |
| S09 | .18 (.07) |  | .45 (.12) | .28 (.07) |  | .56 (.17) | .59 (.05) |  | .60 (.14) | .39 (.07) |  | .39 (.11) | .25b |  | .02b |
| ω | .92 | .86 | .72 | .91 | .77 | .80 | .93 | .86 | .82 | .91 | .81 | .79 | a | a | a |
| ωH | .82 | - | - | .82 | - | - | .86 | - | - | .80 | - | - | a | - | - |
| ωHS | - | .39 | .31 | - | .28 | .33 | - | .28 | .22 | - | .26 | .39 | - | a | a |
| ECV | .74 | .16 | .10 | .76 | .11 | .13 | .79 | .12 | .09 | .71 | .12 | .17 | a | a | a |

*Note*. FBB-P-Clinical = clinical sample of children and adolescents based on proxy ratings completed by parents, SBB-Clinical = clinical sample of adolescents based on self-ratings, FBB-P-Community = community sample of children and adolescents based on proxy ratings completed by parents, SBB-Community = community sample of adolescents based on proxy ratings completed by parents, FBB-T-Special Needs School = pupils attending special needs schools based on proxy ratings completed by teachers, G = general factor, S = specific factor, BI Ext S-1 = bifactor S-1 model of externalizing symptomatology with ODD as a general reference factor, BI Ext S-1* = bifactor S-1 model of externalizing symptomatology with AGG as a general reference factor, ADHD = attention-deficit/hyperactivity disorder, ODD = oppositional defiant disorder, CD = conduct disorder, AGG = aggression, ω = omega (amount of variance accounted for by the g- and s-factors taken together), ωH = omega hierarchical (amount of variance accounted for by the g-factor), ωHS = omega hierarchical subscale (amount of variance accounted for by the s-factors), ECV = explained common variance (proportion of all common variance explained by that factor; for specific factors, the ECV only computes the strength of a specific factor relative to all explained variance of all items, even those not loading on the specific factor).

a = not interpretable due to anomalous factor loading > 1.

b = no standard errors as model did not converge

**Table S3**

*Sample Size-Adjusted Bayesian Information Criterion (BIC) for all Models in all Five Samples*

|  | FBB-P-Clinical | SBB-Clinical | FBB-P-Community | SBB-Community | FBB-T-Special Needs School |
| --- | --- | --- | --- | --- | --- |
| Uni | 11814.494 | 5847.893 | 20929.901 | 10227.560 | 13475.271 |
| CFM-2 | 11596.541 | 5825.756 | 20706.070 | 10188.402 | 13189.054 |
| CFM-3 | 11571.136 | 5814.358 | 20684.419 | 10144.372 | 13190.670 |
| CFM-3* | 11566.558 | 5812.993 | 20685.546 | 10156.932 | 13172.461 |
| BI Ext | 11564.948 | 5810.489 | 20673.973 | 10126.575 | 13132.492 |
| BI Ext S-1 | 11562.803 | 5810.040 | 20688.577 | 10139.215 | 13147.473 |
| BI Ext S-1* | 11568.362 | 5813.442 | 20689.525 | 10151.744 | 13147.038 |

*Note.* FBB-P-Clinical = clinical sample of children and adolescents based on proxy ratings completed by parents, SBB-Clinical = clinical sample of adolescents based on self-ratings, FBB-P-Community = community sample of children and adolescents based on proxy -ratings completed by parents, SBB-Community = community sample of adolescents based on proxy ratings completed by parents, FBB-T-Special Needs School = pupils attending special needs schools based on proxy ratings completed by teachers, Uni = unidimensional model of externalizing symptomatology, CFM-2 = factor model with two correlated factors (ADHD, ODD/CD), CFM-3 = factor model with three correlated factors (ADHD, ODD, CD), CFM-3* = factor model with three correlated factors (ADHD, AGG, RB), BI Ext = bifactor model of externalizing symptomatology, BI Ext S-1 = bifactor S-1 model of externalizing symptomatology with ODD as a general reference factor, BI Ext S-1* = bifactor S-1 model of externalizing symptomatology with AGG as a general reference factor, ADHD = attention-deficit/hyperactivity disorder, ODD = oppositional defiant disorder, CD = conduct disorder, AGG = aggression, RB = rule-breaking.

**Table S4**

*Standardized Factor Loadings (Standard Error) for all Factor Models with Three Correlated Factors (CFM-3; ADHD, ODD, CD)*

| Symptoms | FBB-P-Clinical  (*n* = 743) | SBB-Clinical  (*n* = 387) | FBB-P-Community  (*n* = 2113) | SBB-Community  (*n* = 960) | FBB-T-Special Needs School  (*n* = 755) |
| --- | --- | --- | --- | --- | --- |
| ADHD |  |  |  |  |  |
| S01 Inattentive | .73 (.02) | .68 (.04) | .73 (.02) | .70 (.03) | .74 (.02) |
| S02 Impulsive | .95 (.02) | .80 (.04) | .88 (.01) | .78 (.03) | .97 (.01) |
| S03 Fidgets/Squirms | .76 (.02) | .66 (.04) | .84 (.02) | .76 (.03) | .82 (.02) |
| ODD |  |  |  |  |  |
| S04 Angry | .79 (.02) | .75 (.04) | .78 (.01) | .71 (.03) | .80 (.02) |
| S05 Argues | .95 (.02) | .83 (.04) | .88 (.01) | .81 (.03) | .96 (.01) |
| CD |  |  |  |  |  |
| S06 Threatens | .88 (.03) | .82 (.05) | .78 (.04) | .88 (.06) | .86 (.02) |
| S07 Lies/Steals | .63 (.04) | .72 (.05) | .70 (.03) | .75 (.05) | .64 (.03) |
| S08 Destroys property | .82 (.03) | .91 (.06) | .82 (.04) | .81 (.05) | .81 (.02) |
| S09 Skips school | .24 (.07) | .40 (.07) | .67 (.06) | .53 (.07) | .29 (.06) |

*Note*. *n* = sample size, FBB-P-Clinical = clinical sample of children and adolescents based on proxy ratings completed by parents, SBB-Clinical = clinical sample of adolescents based on self-ratings, FBB-P-Community = community sample of children and adolescents based on proxy ratings completed by parents, SBB-Community = community sample of adolescents based on proxy ratings completed by parents, FBB-T-Special Needs School = pupils attending special needs schools based on proxy ratings completed by teachers, ADHD = attention-deficit/hyperactivity disorder, ODD = oppositional defiant disorder, CD = conduct disorder.

**Table S5**

*Standardized Factor Loadings (Standard Error) for all Factor Models with Three Correlated Factors (CFM-3*; ADHD, AGG, RB)*

| Symptoms | FBB-P-Clinical  (*n* = 743) | SBB-Clinical  (*n* = 387) | FBB-P-Community  (*n* = 2113) | SBB-Community  (*n* = 960) | FBB-T-Special Needs School  (*n* = 755) |
| --- | --- | --- | --- | --- | --- |
| ADHD |  |  |  |  |  |
| S01 Inattentive | .73 (.02) | .68 (.04) | .73 (.02) | .69 (.03) | .74 (.02) |
| S02 Impulsive | .95 (.02) | .80 (.04) | .88 (.01) | .79 (.03) | .97 (.01) |
| S03 Fidgets/Squirms | .76 (.02) | .66 (.04) | .84 (.02) | .76 (.03) | .82 (.02) |
| Aggression |  |  |  |  |  |
| S04 Angry | .78 (.02) | .73 (.04) | .78 (.01) | .70 (.03) | .81 (.02) |
| S05 Argues | .94 (.02) | .80 (.04) | .88 (.01) | .80 (.03) | .97 (.01) |
| S06 Threatens | .82 (.03) | .81 (.05) | .72 (.04) | .74 (.06) | .84 (.02) |
| Rule-Breaking |  |  |  |  |  |
| S07 Lies/Steals | .68 (.04) | .73 (.05) | .72 (.03) | .77 (.05) | .69 (.03) |
| S08 Destroys property | .91 (.04) | .99 (.06) | .84 (.04) | .86 (.06) | .88 (.03) |
| S09 Skips school | .27 (.07) | .41 (.07) | .69 (.06) | .54 (.07) | .31 (.06) |

*Note*. *n* = sample size, FBB-P-Clinical = clinical sample of children and adolescents based on proxy ratings completed by parents, SBB-Clinical = clinical sample of adolescents based on self-ratings, FBB-P-Community = community sample of children and adolescents based on proxy ratings completed by parents, SBB-Community = community sample of adolescents based on proxy ratings completed by parents, FBB-T-Special Needs School = pupils attending special needs schools based on proxy ratings completed by teachers, ADHD = attention-deficit/hyperactivity disorder, AGG = aggression, RB = rule-breaking.

**Table S6**

*Log-Likelihood Value, Scaling Correction Factor and Number of free Parameters*

| Model | Log-Likelihood | Scaling Correction Factor | Number of free parameters |
| --- | --- | --- | --- |
| FBB-P-Clinical | | | |
| CFM-2 | -5734.717 | 1.0097 | 37 |
| CFM-3 | -5718.579 | 1.0161 | 39 |
| BI Ext S-1 | -5705.824 | 1.0324 | 44 |
| CFM-3 | -5716.290 | 1.0111 | 39 |
| BI Ext S-1* | -5710.321 | 1.0435 | 43 |
| SBB Clinical | | | |
| CFM-2 | -2861.346 | 1.0136 | 37 |
| CFM-3 | -2852.861 | 1.0079 | 39 |
| BI Ext S-1 | -2843.739 | 1.0066 | 44 |
| CFM-3 | -2852.179 | 1.0026 | 39 |
| BI Ext S-1* | -2846.832 | 1.0111 | 43 |
| FBB-P-Community | | | |
| CFM-2 | -10270.178 | 1.0083 | 37 |
| CFM-3 | -10254.874 | 1.0031 | 39 |
| BI Ext S-1 | -10245.756 | 1.0606 | 44 |
| CFM-3 | -10255.437 | 0.9977 | 39 |
| BI Ext S-1* | -10248.469 | 1.1275 | 43 |
| SBB Community | | | |
| CFM-2 | -5025.918 | 1.0054 | 37 |
| CFM-3 | -5000.212 | 0.9918 | 39 |
| BI Ext S-1 | -4988.407 | 1.0182 | 44 |
| CFM-3 | -5006.493 | 0.9912 | 39 |
| BI Ext S-1* | -4998.516 | 0.9947 | 43 |
| FBB-T-Special Needs School | | | |
| CFM-2 | -6530.678 | 1.0193 | 37 |
| CFM-3 | -6528.034 | 1.0261 | 39 |
| BI Ext S-1 | -6497.808 | 1.0355 | 44 |
| CFM-3 | -6518.930 | 1.0301 | 39 |
| BI Ext S-1* | -6499.316 | 1.0333 | 43 |

*Note*. FBB-P-Clinical = clinical sample of children and adolescents based on proxy ratings completed by parents, SBB-Clinical = clinical sample of adolescents based on self-ratings, FBB-P-Community = community sample of children and adolescents based on proxy ratings completed by parents, SBB-Community = community sample of adolescents based on proxy ratings completed by parents FBB-T-Special Needs School = pupils attending special needs schools based on proxy ratings completed by teachers. CFM-2 = factor model with two correlated factors (ADHD, ODD/CD), CFM-3 = factor model with three correlated factors (ADHD, ODD, CD), CFM-3* = factor model with three correlated factors (ADHD, AGG, RB), BI Ext S-1 = bifactor S-1 model of externalizing symptomatology with ODD as a general reference factor, BI Ext S-1* = bifactor S-1 model of externalizing symptomatology with AGG as a general reference factor. ADHD = attention-deficit/hyperactivity disorder, ODD = oppositional defiant disorder, CD = conduct disorder, AGG = aggression, RB = rule-breaking.

# 
